# Supplementary material
Source: PubMed Central journal article supplement (PMC5838977)
Supplement: 41431_2017_68_MOESM3_ESM.pdf [file 41431_2017_68_MOESM3_ESM.pdf]

| <b>DGAP ID</b> | <b>Chr</b> | <b>Break Start</b> | <b>Break End</b> | <b>Primary Cell Based</b> | <b>Tissue Based</b> |
|----------------|------------|--------------------|------------------|---------------------------|---------------------|
| DGAP294_1      | chr1       | 106886817          | 106886818        | 0                         | 0                   |
| DGAP294_2      | chr1       | 97136243           | 97136247         | 0                         | 0                   |
| DGAP294_3      | chr1       | 81860918           | 81860987         | 0                         | 0                   |
| DGAP294_4      | chr4       | 38411157           | 38411163         | 0                         | 0                   |
| DGAP294_5      | chr10      | 56995910           | 56995915         | 0                         | 0                   |
| DGAP294_6      | chr14      | 29609215           | 29609216         | 0                         | 0                   |
| DGAP294_7      | chr1       | 526704             | 528024           | 0                         | 0                   |
| DGAP294_8      | chr1       | 17577336           | 17668089         | 0                         | 0                   |



**Genome Segment Broad Combined H1 ESC**

0  
0  
0  
0  
0  
0  
0  
0  
0
